# Supplementary material for: Solvent-free dynamic nuclear polarization enhancements in organically modified mesoporous silica
Source: Royal Society of Chemistry journal article supplement (doi:10.1039/d1cp00985k), 2021-01-01
Supplement: d1cp00985k1.pdf [file d1cp00985k1.pdf]

## Electronic Supporting Information

### Solvent-free dynamic nuclear polarization enhancements in organically modified mesoporous silica

Marcos de Oliveira, Jr.,<sup>a,b,†,\*</sup> Kevin Herr,<sup>a,†</sup> Martin Brodrecht,<sup>a</sup> Nadia B. Haro-Mares,<sup>a</sup> Till Wissel,<sup>a</sup> Vytautas Klimavicius,<sup>a,c</sup> Hergen Breitzke,<sup>a</sup> Torsten Gutmann,<sup>a</sup> Gerd Buntkowsky<sup>a,\*</sup>

- Institut für Physikalische Chemie, Technische Universität Darmstadt, 64287 Darmstadt, Germany*
- São Carlos Institute of Physics, University of São Paulo, PO Box 369, 13560-970, São Carlos, SP, Brazil*
- Institute of Chemical Physics, Vilnius University, Sauletekio av. 3, LT-10257 Vilnius, Lithuania*

† Equally contributing authors

\* Corresponding authors.

Table S1 – Weights of Fmoc-Gly-OH and 3-Carboxy-PROXYL precursors used in the synthesis. The overall mass of the final materials (yield mass) is also given.

| Sample          | Weigh<br>Fmoc-Gly-OH<br>[mg] | Weigh<br>3-Carboxy-PROXYL<br>[mg] | Yield<br>[mg] |
|-----------------|------------------------------|-----------------------------------|---------------|
| 99.5Fmoc/0.5Prx | 79                           | 0.3                               | 54            |
| 95Fmoc/5Prx     | 75                           | 2.5                               | 59            |
| 90Fmoc/10Prx    | 71                           | 5                                 | 58            |
| 75Fmoc/25Prx    | 59                           | 12                                | 50            |
| 50Fmoc/50Prx    | 40                           | 25                                | 64            |

Table S2: Median pore diameters calculated by the BJH (left) and NLDFT (right) method of the prepared SBA-15 with APTES linker and functionalized mesoporous silica materials as obtained from BET analysis.

| Sample            | Pore diameter<br>by BJH<br>/ nm | Pore diameter<br>by NLDFT<br>/ nm |
|-------------------|---------------------------------|-----------------------------------|
| SBA-15 with APTES | 5.5                             | 7.9                               |
| 99.5Fmoc/0.5Prx   | 5.3                             | 6.6                               |
| 95Fmoc/5Prx       | 5.3                             | 7.0                               |
| 90Fmoc/10Prx      | 5.4                             | 6.6                               |
| 75Fmoc/25Prx      | 5.3                             | 6.6                               |
| 50Fmoc/50Prx      | 5.2                             | 6.6                               |

Table S3. Pore volume (Gurvich at  $p/p^0$  0.95), specific surface area (BET), nitrogen loading and carbon/nitrogen ratio of the support material determined by EA.

| Sample            | Pore Volume (BET) / $\text{cm}^3 \cdot \text{g}^{-1}$ | Surface Area (BET) / $\text{m}^2 \cdot \text{g}^{-1}$ | Nitrogen loading (EA) / $\text{mmol} \cdot \text{g}^{-1}$ | C/N ratio (Theo.) | C/N ratio (Exp.) |
|-------------------|-------------------------------------------------------|-------------------------------------------------------|-----------------------------------------------------------|-------------------|------------------|
| SBA-15 with APTES | 0.72                                                  | 537                                                   | $1.78 \pm 0.3$                                            | 3.00              | $3.13 \pm 0.5$   |

Table S4 - Elemental Analysis. Two measurements were performed for each sample.

| Sample                      | C/N ratio | Carbon (%) | Hydrogen (%) | Nitrogen (%) |
|-----------------------------|-----------|------------|--------------|--------------|
| Amine functionalized SBA-15 | 2.835     | 8.018      | 3.11         | 2.829        |
| Amine functionalized SBA-15 | 2.842     | 7.728      | 3.399        | 2.719        |
| X 0.5                       | 3.611     | 17.24      | 3.013        | 4.775        |
| X 0.5                       | 3.65      | 17.1       | 2.859        | 4.685        |
| X 5                         | 3.408     | 17.05      | 3.271        | 5.004        |
| X 5                         | 3.29      | 16.71      | 3.682        | 5.079        |
| X 10                        | 3.68      | 16.59      | 3.101        | 4.509        |
| X 10                        | 3.511     | 16.39      | 3.108        | 4.667        |
| X 25                        | 3.092     | 15.48      | 3.291        | 5.006        |
| X 25                        | 3.112     | 15.43      | 3.349        | 4.958        |
| X 50                        | 3.266     | 15.51      | 3.024        | 4.747        |
| X 50                        | 3.268     | 14.96      | 3.182        | 4.578        |

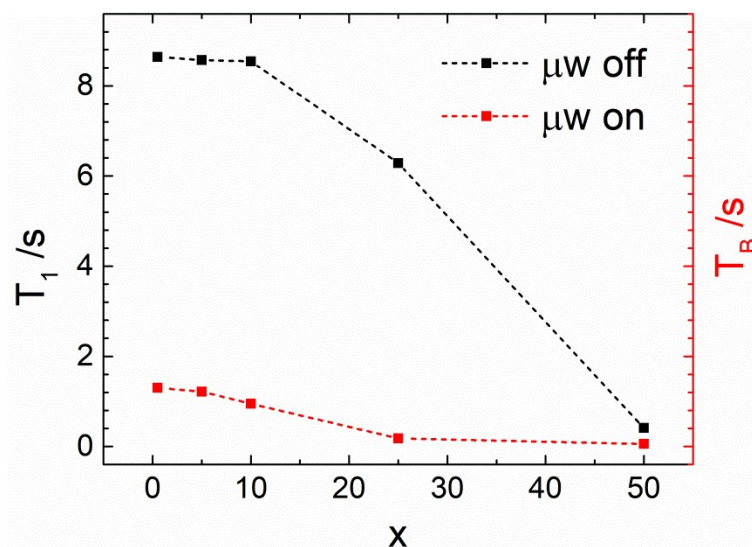

**Figure S1** –  $^1\text{H}$  spin-lattice relaxation times ( $T_1$ ,  $\mu\text{W}$  off) and DNP build-up times ( $T_B$ ,  $\mu\text{W}$  on) as a function of composition parameter  $x$  for the investigated samples. Values were obtained from unconstrained least-square fittings of saturation-recovery curves by using stretched exponential functions.

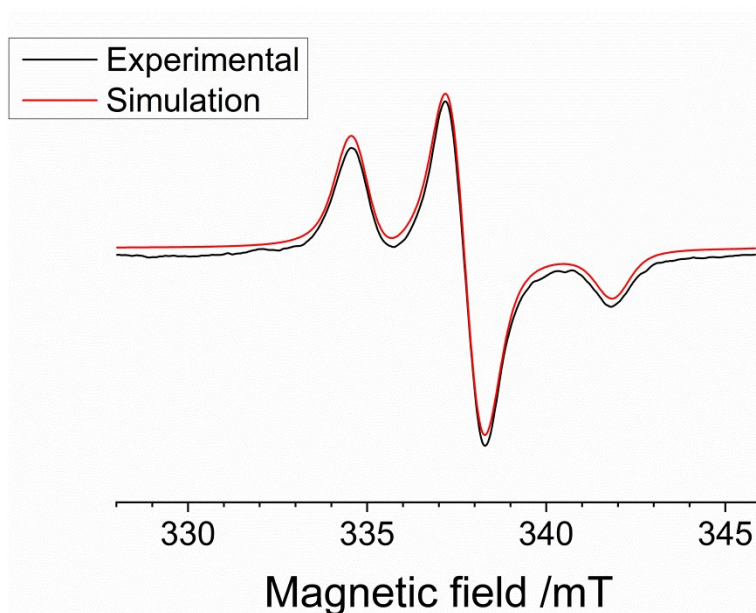

**Figure S2** – Experimental (black curve, bottom) and simulated (red curve, top) cw EPR spectra for the sample with  $x = 10$  mol%. The experimental spectrum was measured at 100 K. The simulation was performed using the EasySpin<sup>1</sup> package for the Matlab<sup>®</sup> software. The simulation uses the “pepper” function from EasySpin,<sup>1</sup> which considers a solid state powder. The system consists of an electron spin with rhombic  $g$  and  $^{14}\text{N}$ -hyperfine tensors ( $^{15}\text{N}$  was also considered in natural abundance). The parameters were optimized by comparing experimental and simulated spectra, using a combination of least-square fitting and genetic algorithms and taking the parameters reported by Dhanasekaran et al.<sup>2</sup> as initial guess. The final parameters for the simulation are  $g_{xx} = 2.0088$ ,  $g_{yy} = 2.0057$ ,  $g_{zz} = 2.0021$ ,  $A_{xx} = 12 \pm 1$  MHz and  $A_{yy} = 14 \pm 1$  MHz and  $A_{zz} = 102 \pm 1$  MHz. The simulation also considers a Gauss-Lorentz (0.6-0.4) isotropic line broadening of 28 MHz (peak-to-peak).

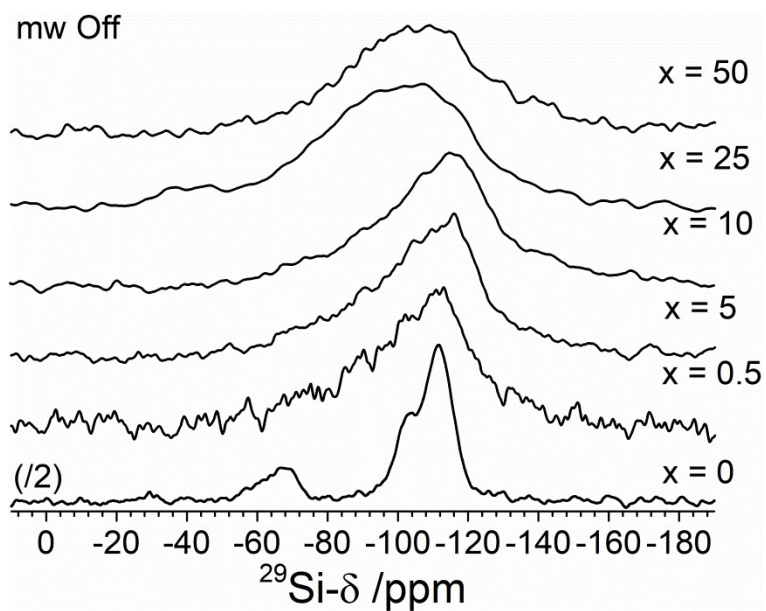

**Figure S3** –  $^{29}\text{Si}$  MAS NMR spectra for the investigated samples ( $x = 0.5$  to 50) and for a sample without carboxy-PROXYL radical ( $x = 0$ ). The spectral line width increases for increasing radical concentration due to electron-nucleus hyperfine interaction.

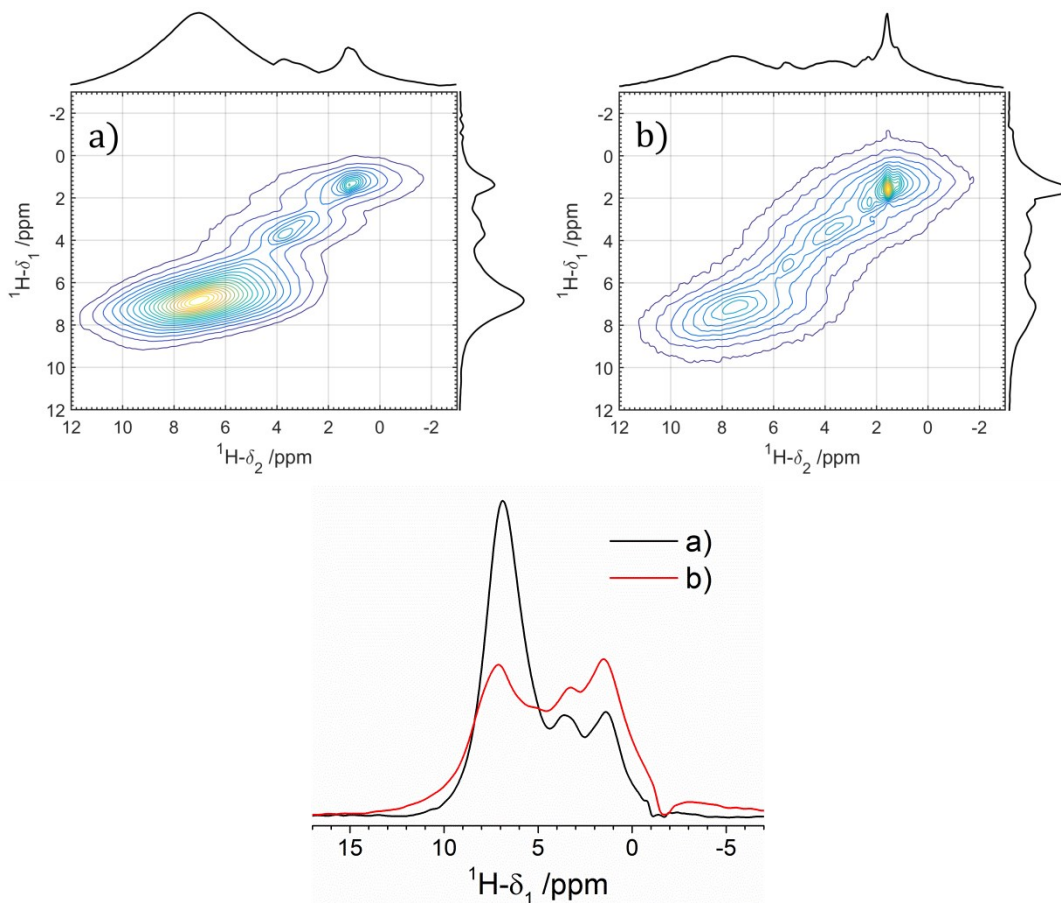

**Figure S4** – Top:  $^1\text{H}$ – $^1\text{H}$  MAS FSLG spectrum of a) mesoporous SBA-15 functionalized with APTES and Fmoc-Glycine (diamagnetic sample) and b) mesoporous SBA-15 functionalized with APTES, Fmoc-Glycine and Carboxy-PROXYL radicals (paramagnetic sample,  $x = 50$ ). Skyline projections are also displayed. Bottom: comparison of the projections taken from the sum over the indirectly detected ( $\delta_1$ ) dimension for both spectra shown on top. 2D spectra were measured with a z-filtered  $^1\text{H}$ – $^1\text{H}$  correlation pulse sequence with Frequency Switched Lee–Goldberg decoupling during  $t_1$  evolution.<sup>3</sup> The experiments were performed using  $^1\text{H}$  carrier frequency of 400 MHz, spinning rate of 10 kHz and z-filter delay of 1  $\mu\text{s}$ . In this experiment a MAS spectrum is detected in the direct domain ( $\delta_2$ ) while FSLG decoupled signal is achieved in the indirect domain ( $\delta_1$ ). Due to the FSLG decoupling the  $^1\text{H}$ – $^1\text{H}$  dipolar coupling is averaged out and the line broadening caused by  $^1\text{H}$  spin-spin relaxation mechanism is suppressed. The result is a resolution enhancement in the  $\delta_1$  projection and the detection of the  $\delta_2$  projections similar to the 1D spectrum. On the other hand, the electron-nucleus hyperfine interaction is not averaged out by FSLG decoupling leading to fast relaxation of areas containing the radicals. As a result, only components outside of the effective paramagnetic shell will survive seen as relative enhancement of the peak at 1.2 ppm in the projections, accompanied by a higher resolved  $\delta_1$  projections. This peak belongs most probably to mobile and isolated water molecules on the surface,<sup>4</sup> far away from the radicals.

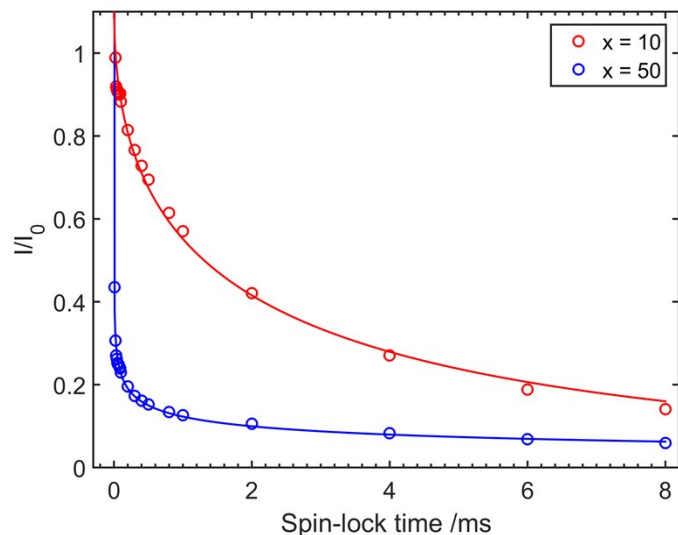

**Figure S5** –  $^1\text{H}$  magnetization as a function of the spin-lock time for samples  $x = 10$  and  $x = 50$ , measured using a  $90^\circ$ -spinlock pulse sequence, nuclei are excited by a  $90^\circ$  pulse and then spin-locked by a continuous wave pulse (with a phase shift of  $\pi/2$  relative to the excitation pulse) for a time  $\tau$ .<sup>5</sup> The experimental points are normalized to the extrapolated equilibrium magnetization. The evolution of the magnetization curves gives information about the  $^1\text{H}$  spin lattice relaxation in the rotating frame ( $T_1^\rho$ ). Solid curves are exponential fit to the data, using a stretched exponential function of the form  $I = I_0 \exp\left(-\left(t/T_1^\rho\right)^\beta\right)$  (see parameter values in Table S5). Due to the distribution of distances between H species and the unpaired electrons in the sample, a continuous distribution of relaxation times is expected. Clearly, for the sample with  $x = 50$  the effective  $^1\text{H}$  spin relaxation is much faster than for the sample with  $x = 10$ . For this reason,  $^1\text{H}$ - $^{13}\text{C}$  CP transfer could not be achieved for sample  $x = 50$  (see main text).

**Table S5:** Fitting parameters to a stretched exponential decay function,  $I = I_0 \exp\left(-\left(t/T_1^\rho\right)^\beta\right)$ , adjusted on the data shown in Figure S5.

| Sample   | $T_1^\rho$ (ms)    | $\beta$ |
|----------|--------------------|---------|
| $x = 10$ | 2.1                | 0.5     |
| $x = 50$ | $2 \times 10^{-3}$ | 0.1     |

## References

- 1 S. Stoll and A. Schweiger, EasySpin, a comprehensive software package for spectral simulation and analysis in EPR, *J. Magn. Reson.*, 2006, **178**, 42–55.
- 2 A. Dhanasekaran, S. Kotamraju, C. Karunakaran, S. V. Kalivendi, S. Thomas, J. Joseph and

- B. Kalyanaraman, Mitochondria superoxide dismutase mimetic inhibits peroxide-induced oxidative damage and apoptosis: Role of mitochondrial superoxide, *Free Radic. Biol. Med.*, 2005, **39**, 567–583.
- 3 B. Kumari, M. Brodrecht, T. Gutmann, H. Breitzke and G. Buntkowsky, Efficient Referencing of FSLG CPMAS HETCOR Spectra Using 2D 1H–1H MAS FSLG, *Appl. Magn. Reson.*, 2019, **50**, 1399–1407.
- 4 B. Grünberg, T. Emmler, E. Gedat, I. Shenderovich, G. H. Findenegg, H.-H. Limbach and G. Buntkowsky, Hydrogen Bonding of Water Confined in Mesoporous Silica MCM-41 and SBA-15 Studied by <sup>1</sup>H Solid-State NMR, *Chem. - A Eur. J.*, 2004, **10**, 5689–5696.
- 5 A. Abragam, *The Principles of Nuclear Magnetism*, Oxford Univ. Press, Oxford, 1961.
